# Supplementary material for: Covalent triazine frameworks for the dynamic adsorption/separation of benzene/cyclohexane mixtures
Source: Royal Society of Chemistry journal article supplement (doi:10.1039/d2nj00727d), 2022-01-01
Supplement: d2nj00727d1.pdf [file d2nj00727d1.pdf]

## Electronic Supplementary Information (ESI)

### Covalent Triazine Frameworks for the Dynamic Adsorption/Separation of Benzene/Cyclohexane Mixtures

Jun Yan,<sup>\*ab</sup> Haiyu Sun,<sup>ab</sup> Qilin Wang,<sup>ab</sup> Lu Lu,<sup>ab</sup> Biao Zhang,<sup>c</sup> Zhonggang Wang,<sup>\*d</sup> Shengwei Guo<sup>\*ab</sup> and Fenglan Han<sup>\*ab</sup>

<sup>a</sup>Key Laboratory of Polymer Materials and Manufacturing Technology, School of Materials Science and Engineering, North Minzu University, Yinchuan 750021, China

<sup>b</sup>International Scientific and Technological Cooperation Base of Industrial Solid Waste Cyclic Utilization and Advanced Materials, Yinchuan 750021, China

<sup>c</sup>Key Laboratory of Low Dimensional Materials and Application Technology of Ministry of Education, School of Materials Science and Engineering, Xiangtan University, Xiangtan 411105, China.

<sup>d</sup>State Key Laboratory of Fine Chemicals, Department of Polymer Science and Materials, School of Chemical Engineering, Dalian University of Technology, Dalian 116024, China

\* Corresponding authors

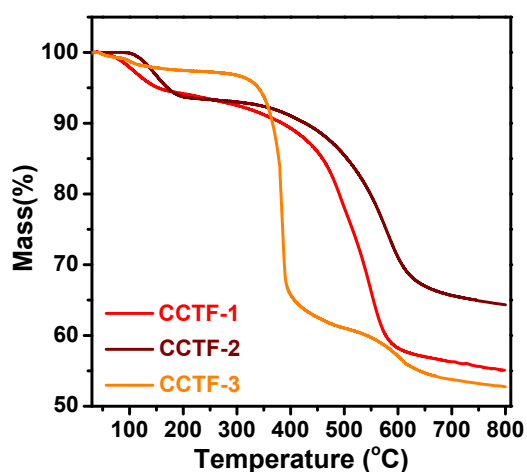

Fig. S1 The TGA curves of CCTF-1, CCTF-2, and CCTF-3.

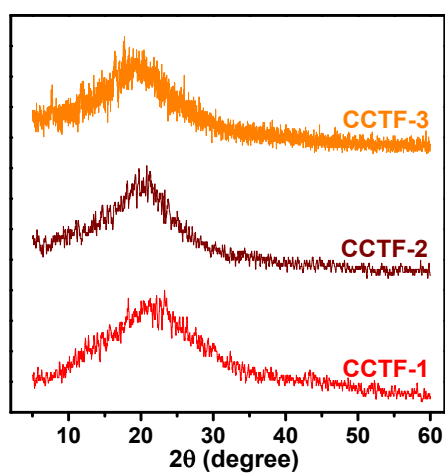

Fig. S2 X-ray diffractions of CCTFs.

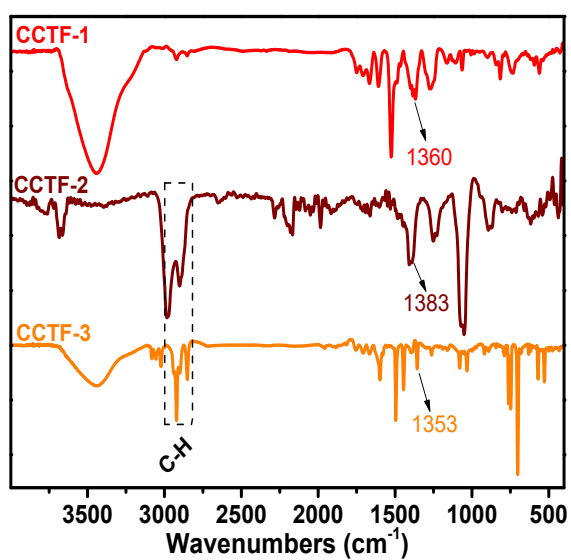

Fig. S3 The FT-IR spectrum of CCTF-1, CCTF-2, and CCTF-3.

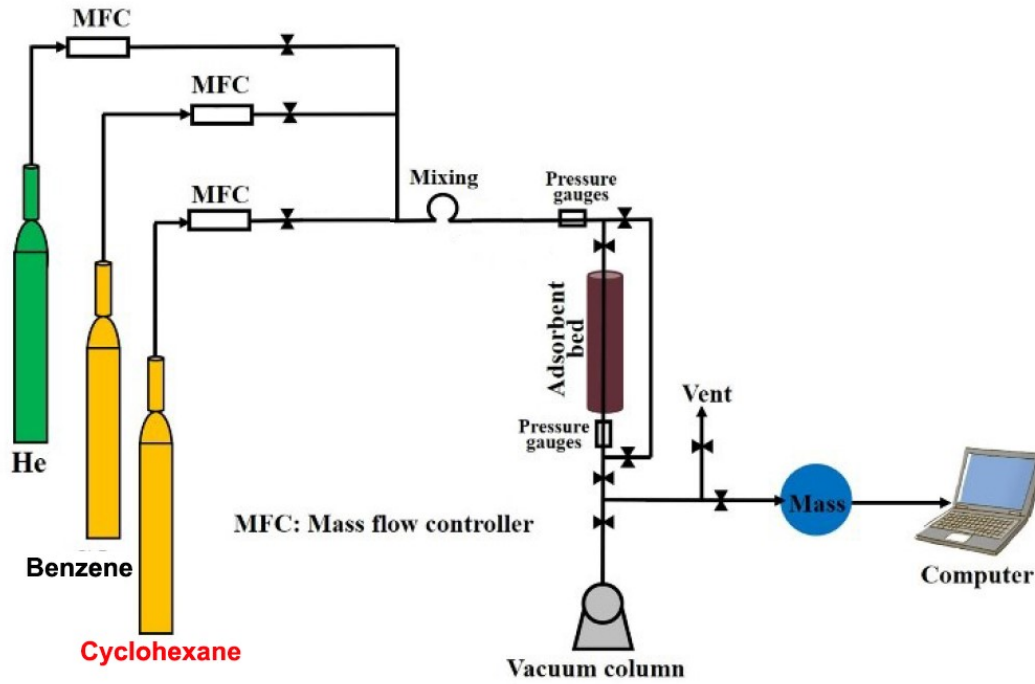

Fig S4. Scheme of the dynamic breakthrough apparatus.

The adsorption amount of adsorbent  $n$  is calculated according to the equation S1 as:

$$Q_{nad} = Q_{nin} - Q_{nout} = q_{in} \times C_{n0} \times \Delta T - \int_0^t [(q / (1 - \sum_1^N C_{nt}))] * C_{nt} dt \quad S1$$

$Q_{nad}$  is the adsorption amount of adsorbent  $n$ ;  $Q_{nin}$  is total flow rate of adsorbent  $n$  flowing in of the penetrating column at  $\Delta T$ ;  $Q_{nout}$  is total flow rate of adsorbent  $n$  flowing out of the penetrating column at  $\Delta T$ ;  $q_{in}$  is total flow rate of gas through the column inlet;  $C_{n0}$  is the total flow rate of gas through the outlet of the column;  $\Delta T$  is the total adsorption time (min);  $q$  is the flow rate of carrier gas;  $C_{nt}$  is the percentage concentration of adsorbent  $N$  at the entrance of the penetrating column;

The selectivity of gas (1) over gas (2) is calculated according to the equation S2 as:

$$S = \left(\frac{X_1}{Y_1}\right) \div \left(\frac{X_2}{Y_2}\right) \quad S2$$

$X_1/Y_1$ : Molar fraction of component 1 in the adsorbed phase/molar fraction of component 1 in the gas phase

$X_2/Y_2$ : Molar fraction of component 2 in the adsorbed phase/molar fraction of component 2 in the gas phase

The diffusion coefficient of vapor

$$D = \frac{L^2}{6t_{eq}}$$

S3

D is the diffusion coefficient of vapor; L is the loading length;  $t_{eq}$  is the delay time.

Table S1. Comparison of uptakes of benzene and cyclohexane vapors, Bz/Cy selectivity between CCTFs, and other porous materials reported in the literature

| <b>Samples</b>        | <b>S<sub>BET</sub><br/>(m<sup>2</sup>/g)</b> | <b>Bz (mg/g)</b> | <b>Cy<br/>(mg/g)</b> | <b>Ideal Bz/Cy<br/>Selectivity</b> | <b>Ref</b> |
|-----------------------|----------------------------------------------|------------------|----------------------|------------------------------------|------------|
| <b>CCTF-1</b>         | 512                                          | 878              | 441                  | 1.99                               | This work  |
| <b>CCTF-2</b>         | 538                                          | 650              | 311                  | 2.09                               | This work  |
| <b>CCTF-3</b>         | 207                                          | 136              | 61                   | 2.23                               | This work  |
| <b>PAF-2</b>          | 891                                          | 138              | 7                    | 19.71                              | 1          |
| <b>Hybrid[3]arene</b> | 0.9                                          | 80.4             | 7.5                  | 10.72                              | 2          |
| <b>MALP-1</b>         | 1179                                         | 585              | 492                  | 1.19                               | 3          |
| <b>MALP-2</b>         | 1126                                         | 545              | 472                  | 1.15                               | 3          |
| <b>MALP-3</b>         | 1141                                         | 571              | 488                  | 1.17                               | 3          |
| <b>MALP-4</b>         | 1093                                         | 558              | 465                  | 1.20                               | 3          |
| <b>CE-P1</b>          | 630                                          | 478              | -                    | -                                  | 4          |
| <b>CE-P2</b>          | 195                                          | 151              | -                    | -                                  | 4          |
| <b>PAN-1</b>          | 925                                          | 726              | 527                  | 1.38                               | 5          |
| <b>PAN-2</b>          | 1242                                         | 692              | 383                  | 1.81                               | 5          |
| <b>PAN-F</b>          | 702                                          | 544              | 433                  | 1.26                               | 6          |
| <b>PAN-T</b>          | 795                                          | 570              | 518                  | 1.10                               | 6          |
| <b>CMP-S-1</b>        | 873                                          | 647.4            | 378                  | 1.71                               | 7          |
| <b>MP1</b>            | 1020                                         | 765              | 440                  | 1.74                               | 8          |
| <b>PCN-AD</b>         | 843                                          | 980              | 574                  | 1.71                               | 9          |
| <b>PBI-Ad-1</b>       | 1023                                         | 980              | 536                  | 1.83                               | 10         |
| <b>PBI-Ad-2</b>       | 926                                          | 765              | 463                  | 1.65                               | 10         |
| <b>PCN-TPC</b>        | 686                                          | 176              | 74                   | 2.38                               | 11         |
| <b>PCN-TPPC</b>       | 662                                          | 778              | 107                  | 7.27                               | 11         |
| <b>UMC-600</b>        | 1980                                         | 663              | 527                  | 1.26                               | 12         |
| <b>UMC-700</b>        | 2212                                         | 735              | 605                  | 1.21                               | 12         |
| <b>UMC-800</b>        | 2406                                         | 868              | 734                  | 1.18                               | 12         |
| <b>FJU-P6</b>         | 1066                                         | 630.4            | 313.6                | 2.01                               | 13         |
| <b>FJU-P7</b>         | 1425                                         | 768.6            | 640.4                | 1.20                               | 13         |
| <b>PCN-TA</b>         | 721                                          | 1009             | 206                  | 4.90                               | 14         |
| <b>PCN-TC</b>         | 674                                          | 867              | 244                  | 3.55                               | 14         |
| <b>PCN-DC</b>         | 393                                          | 635              | 129                  | 4.92                               | 14         |
| <b>POP-1</b>          | 486                                          | 1020             | 658                  | 1.55                               | 15         |
| <b>MPI-1</b>          | 1454                                         | 1198             | 501                  | 2.39                               | 16         |
| <b>MPI-2</b>          | 814                                          | 766              | 448                  | 1.71                               | 16         |
| <b>MPI-3</b>          | 586                                          | 549              | 415                  | 1.32                               | 16         |
| <b>sPI-1</b>          | 1108                                         | 1597             | 851                  | 1.88                               | 17         |
| <b>sPI-2</b>          | 900                                          | 1760             | 778                  | 2.26                               | 17         |

## Reference

1. H. Ren, T. Ben, E. Wang, X. Jing, M. Xue, B. Liu, Y. Cui, S. Qiu and G. Zhu, *Chem. Commun.*, 2010, **46**, 291-293.
2. J. Zhou, G. Yu, Q. Li, M. Wang and F. Huang, *J Am Chem Soc*, 2020, **142**, 2228-2232.
3. M. Rong, L. Yang, L. Wang, H. Xing, J. Yu, H. Qu and H. Liu, *Ind. Eng. Chem. Res.*, 2019, **58**, 17369-17379.
4. H. Yu, C. Shen and Z. Wang, *ChemPlusChem*, 2013, **78**, 498-505.
5. G. Li, B. Zhang, J. Yan and Z. Wang, *Macromolecules*, 2014, **47**, 6664-6670.
6. G. Li, B. Zhang, J. Yan and Z. Wang, *Chem. Commun.*, 2016, **52**, 1143-1146.
7. T. Chen, W. Zhang, B. Li, W. Huang, C. Lin, Y. Wu, S. Chen and H. Ma, *ACS Appl. Mater. Interfaces*, 2020, **12**, 56385-56392.
8. X. Ma, Y. Wang, K. Yao, Z. Ali, Y. Han and I. Pinnau, *ACS Omega*, 2018, **3**, 15966-15974.
9. C. Shen, H. Yu and Z. Wang, *Chem. Commun.*, 2014, **50**, 11238-11241.
10. B. Zhang, G. Li, J. Yan and Z. Wang, *J. Phys. Chem. C*, 2015, **119**, 13080-13087.
11. G. Deng and Z. Wang, *ACS Appl. Mater. Interfaces*, 2017, **9**, 41618-41627.
12. J. Yan, B. Zhang and Z. Wang, *J. Phys. Chem. C*, 2017, **121**, 22753-22761.
13. L. Chen, H. Zhang, Y. Ye, Z. Yuan, J. Wang, Y. Yang, S. Lin, F. Xiang, S. Xiang and Z. Zhang, *New J. Chem.*, 2021, **45**, 22437-22443.
14. C. Shen, J. Yan, G. Deng, B. Zhang and Z. Wang, *Polym. Chem.*, 2017, **8**, 1074-1083.
15. H. Tan, Q. Chen, T. Chen and H. Liu, *ACS Appl. Mater. Interfaces*, 2018, **10**, 32717-32725.
16. G. Li and Z. Wang, *Macromolecules*, 2013, **46**, 3058-3066.
17. J. Yan, B. Zhang and Z. Wang, *Polym. Chem.*, 2016, **7**, 7295-7303.
